# Supplementary material for: Nup98 FG domains from diverse species spontaneously phase-separate into particles with nuclear pore-like permselectivity
Source: eLife journal article supplement (doi:10.7554/elife.04251), 2014-12-29

### (\*Rational for simulation of influx into an FG particle \*)

(\* A perfectly spherical FG particle is placed in a far larger buffer reservoir . The initial concentration of the mobile species is 1 in the buffer and 0 inside the particle . We simulate the influx of the mobile species with the input parameters given below and exploit the spherical symmetry of the system . The system is subdivided into concentric sphere shells (n shells for the particle and m shells for the surrounding buffer ). Fluxes are computed from concentration differences between neighbouring shells \*)

### (\*Input parameters \*)

**diameter** = 7 (\*diameter of the FG particle in  $\mu\text{m}$ \*);

**D1** = 0.1 (\*Diffusion constant of mobile species inside the FG particle in  $\frac{\mu\text{m}^2}{\text{sec}}$  \*);

**D2** = 50 (\*Diffusion constant in free buffer in  $\frac{\mu\text{m}^2}{\text{sec}}$  \*);

**PC** = 220 (\*Partition coefficient FG particle : buffer \*);

**CaptureEfficiency** = 1 (\*Probability that a colliding NTR-cargo complex gets captured by the particle \*);

**time** = 1000 (\*defines for how many seconds the simulation should run\*);

**n** = 50 (\*Subdivision of the FG particle into n concentric and equi-distant shells \*);

**m** = 1000 (\*Subdivision of the surrounding buffer compartment into m shells \*);

**concentration** = 1 (\*starting concentration of mobile outside the sphere \*);

### (\*Equations for volumes and contact areas\*)

(\*Thickness of sphere shells \*)

$$h = \frac{\text{diameter}}{2 * n};$$

(\*Volume V[i] for each sphere shell i is calculated \*)

$$\text{Do}\left[V[i] = \frac{4 * \pi * h^3 * (i^3 - (i-1)^3)}{3}, \{i, 1, n+m\}\right];$$

(\*Contact areas A[i] are calculated for all shell neighbours i and i+1\*)

$$\text{Do}\left[A[i] = 4 * \pi * h^2 * i^2, \{i, 1, n+m\}\right];$$

### (\*Equations for fluxes Flux[i,i+1] between neighbouring shells\*)

(\*Implements Ficks first law of diffusion :

$$\text{Flux}[i,i+1] = -A * D * \frac{c[i] - c[i+1]}{h}$$

with A being the contact area, D the diffusion constant, and  $\frac{c[i] - c[i+1]}{h}$  the local concentration gradient .\*)

(\*Shell 1 is set as boundary with zero flux to the outside of the system \*)

$$\text{Flux}[0, 1] = 0;$$

(\*Fluxes inside the FG particles with diffusion constant D1\*)

$$\text{Do}\left[\text{Flux}[i, i+1] = \frac{D1 * A[i] * (c[i+1][t] - c[i][t])}{h}, \{i, 1, n-1\}\right];$$

(\*Flux between outermost FG particle shell and adjacent buffer shell . Capture rate for a mobile species by the FG particle is given by the diffusion constant inside the buffer (D2) multiplied with Capture efficiency . Exit rate from the FG particle equals the entry rate divided by the partition coefficient PC.\*)

$$\text{Flux}[n, n+1] = \text{CaptureEfficiency} * \frac{D2 * A[n] * (c[n+1][t] - \frac{c[n][t]}{PC})}{h};$$

(\*Fluxes in free buffer \*)

$$\text{Do}\left[\text{Flux}[i, i+1] = \frac{D2 * A[i] * (c[i+1][t] - c[i][t])}{h}, \{i, n+1, n+m-1\}\right];$$

(\*Shell n+m is set as boundary with zero flux to the outside of the system \*)

$$\text{Flux}[n+m, n+m+1] = 0;$$

(\*Assembly of an ordinary differential equation (ODE) system \*)

(\*ODEs describe how the local concentration of the mobile species changes in each of the shells over time \*)

```
Do[ODE[i] =  $\partial_t c[i][t] = \frac{\text{Flux}[i, i+1] - \text{Flux}[i-1, i]}{V[i]}$ , {i, 1, n+m}]
ODES = Table[ODE[i], {i, 1, n+m}];
```

(\*Setup of initial conditions \*)

```
InitialConditions =
  Join[Table[c[i][0] == 0, {i, 1, n}], Table[c[i][0] == concentration, {i, n+1, n+m}]];
```

(\*Definition of seeked functions \*)

```
Functions = Table[c[i], {i, 1, n+m}];
```

(\*Numerical solution to the ODE system \*)

```
lsg = NDSolve[Join[ODES, InitialConditions], Functions, {t, 0, time}];
```

(\*Output of simulation data \*)

(\*Input of timepoints in seconds \*)

```
timepoints = {180, 30, 1};
```

(\*Actual output \*)

```
nn = Length[timepoints];
```

```
Do[timepoint = timepoints[[k]];
```

```
simu[k] = Flatten[Table[{h * i,  $\frac{c[\text{Abs}[i] + 1][\text{timepoint}]}{c[n+m][\text{timepoint}]}$ } /. lsg, {i, -n-n, n+n}], 1],
  {k, 1, nn}];
```

```
ListLinePlot[Table[Legended[simu[k], StringJoin[ToString[timepoints[[k]]], " sec"]],
  {k, 1, nn}],
  AxesOrigin → {-2 * h * n, -5},
  Frame → True,
  FrameLabel →
    {"Concentration of mobile species", None}, {"μm from particle center", None}},
  GridLines → Automatic,
  FrameStyle → Thickness[0.0015],
  BaseStyle → {FontFamily → "Helvetica", FontSize → 16},
  ImageSize → {400, 300},
  PlotRange → {{-diameter, +diameter}, {-10, PC + 30}}]
```

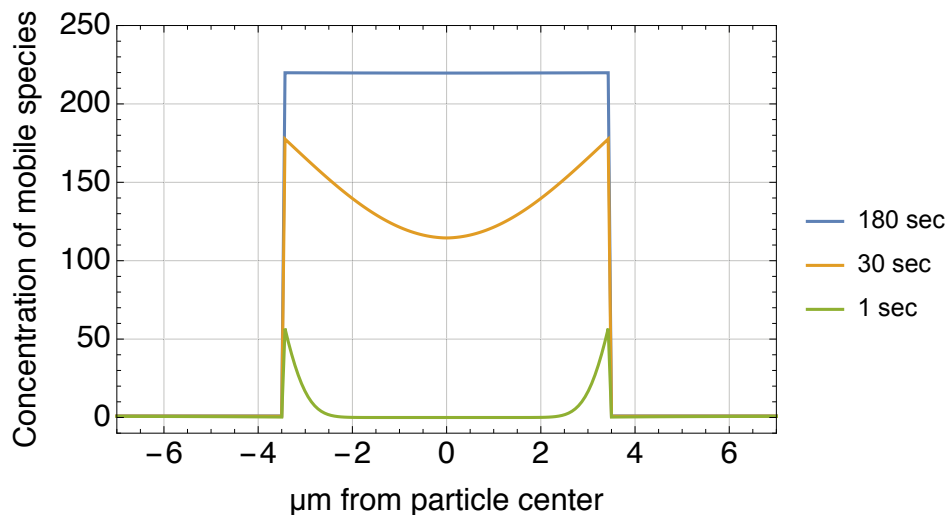

Supplement: supp1 [file elife-04251-supp1-v1.pdf]
