# Supplementary material for: Nup98 FG domains from diverse species spontaneously phase-separate into particles with nuclear pore-like permselectivity
Source: eLife journal article supplement (doi:10.7554/elife.04251), 2014-12-29

## *Homo sapiens* Nup98

500 residues (443 without GLEBS domain)

MFNKSFGTPFGGTGFGTTSTFGQNTGFGTTSGGAFGTSAFGSSNNTGLFGNSQTKPGLFGTSSFSQP  
 ATSTSTGFGFGTSTGTANTLFGTASTGTSLFSSQNNAFAQNKPTGFGNFGTSSGLFGTTNTSNPFGS  
 TSGSLFGPSSFTAAptgttikfnpptgtdtmvkagvstnistkhqcitamkeyesksleerledyqanrk  
 GPQNQVGAGTTTGLFGSPATSSATGLFSSTTNSGFAYGQNKTAFGTSTTGFGTNPGLFGQQNQTTSL  
FSKPFGQATTTQNTGFSFGNTSTIGQPSTNTMGSFGVTQASQPGLFGTATNTSTGTAFGTGLFGQTNT  
GFGAVGSTLFGNNKLTTFGSGTSAPSFGTTSGLFGFGTNTSGNSIFGSKPAPGTLGTGLGAGFGTALGA  
 GQASLFGNNQPKIGGPLGTGAFGAPGFNTTTATLGFGAPQAPVALTDPNASAAQQAVLQQHINSLTYSPFG  
DS

Localization of GLEBS domain:

Distribution of all 39 FG dipeptides:

Distribution of remaining hydrophobic residues:

Distribution of NQ residues:

Distribution of charged residues:

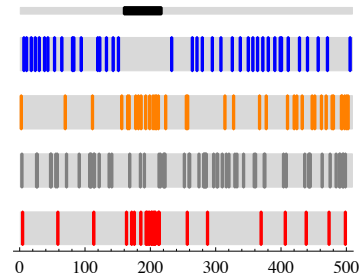

## *Branchiostoma floridae* Nup98

479 residues (427 without GLEBS domain)

MFGQQKTPFGGTTGFGTGAFGTSSFGATQTPATGLFGGTATNTGTGLFGGTSFGTPSTSTSTFGGFGTS  
 TQTGGGLFGTSTSTAGTGLFATPQQQTAPFGAANKTGFGGFGTQTSTAATGTGLFGATQQTPSLFGGGQT  
 STGLFGAVGGIAAGTNGTTvkfnpvsgsdtmmkngvsqnirtahqcitamkeyetksleervedyanrk  
 GGSTGTTAMFGATATPQTGGGLFGNTATTTSTTGFTFGKAAFGTGQTQAKGATGFGTTSTGTGLFGQTQT  
 QAGGLFASPFGGTATTTTPSTGFSFGQNTGTGLFGQTQQKTGLFGQPTTQTTGLFGTPSTTTTTGFGTT  
 GTGTFGTQNQAGGLFGANKAPTFGATTTTSTTGLFGNTATNTGLFGQNKPGLTLGLGTGFGTGAFGTT  
 TSTGTSLFGPKPTNTFGAGLTGLGAGLTLGTGSIFGNTGLGAGIGTGTTG

Localization of GLEBS domain:

Distribution of all 40 FG dipeptides:

Distribution of remaining hydrophobic residues:

Distribution of NQ residues:

Distribution of charged residues:

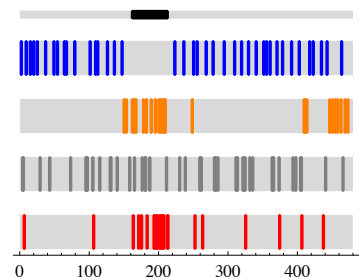

## *Drosophila melongaster* Nup98

581 residues (528 without GLEBS domain)

MFGGAKPSFGATPAATSFGGFSGTTTTTPFGQSAFGKPAAPAFGNTSTFAAQPAQQSLFGAATPAQPAGG  
LFGANTSTGFGSTATAQPTAFGAFSQPQOTSNIFGSTQTAASTSLFGQSTLPAFGAAKPTMTAFGQTAAAQ  
PTGSLFGQPAAATSTTGFGGFGTSAPTTTNVFGSGTASAFAQPQATAVGASGVNTGTAvakyqptigtdtl  
mksggansvntkqhcitamkefegksleerledymcgrkGPQAGNAPGAFGFGAQVTQPAQPASGGLFGS  
TAQPSTGLFGQTVTENKSMFGTTAFGQQPATNNAFGAATQQNNFLQKPFGATTTTPFAAPADASNPFGAK  
PAFGQGGSLFGQAPATSAAPAFGQTNTGFGGFGTTAGATQQSTLFGATPAADPNKSAFGLGTAASAATTGF  
GFGAPATSTAGGLFGNKPATSFAAPTFGATSTASTPFSNFLNTSTAATGGLFNSGLNKPATSGFGGFG  
ATSAAPLNFNAGNTGGSLFGNTAKPGGGLFGGGTTLGGTGAAPTGLFGGGTTSFGVGGSLGGGGFGMG  
TNNSLTGGIMGA

Localization of GLEBS domain:

Distribution of all 46 FG dipeptides:

Distribution of remaining hydrophobic residues:

Distribution of NQ residues:

Distribution of charged residues:

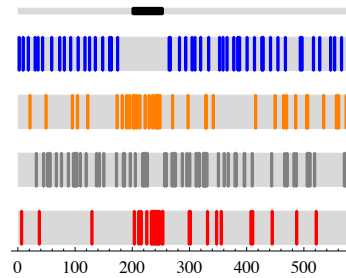

## *Caenorhabditis elegans* Nup98

494 residues (442 without GLEBS domain)

MFGQNKSFGSSFGGSSGSLFGQNNQNNQNKGLFGQPANNSGTTGLFGAQNKPAGSIFGAASNTSSIF  
GSPQQPQNNQSSLFGGGQNNANRSIFGSTSSAPASSSLFGNNANNTGTSSIFGSNNNAPSGGLFGASTV  
SGTTvkfeppissdtmmrngttqtistkhmcisamskydgksielrvedyianrkAPGTGTTSTGGLFG  
ASNTTNQAGSSLFGSSNAQQKTSLFGASTSSPFGNTSTANTGSSLFGNNNANTSAASGSLFGAKPAGS  
SLFGSTATTGASTFGQTTGSSLFGNQQPQTNTGGSLFGNTQNQNQSGSLFGNTGTTGLFGQAQQPQQ  
SSGFSFGGAPAATNAFGQPAAANTGGSLFGNTSTANTGSSLFGAKPATSTGFTFGATQPTTTNAFGSTNTG  
GLFGNNAKPGLFGNTTNTGTGGLFGSQPQASSGLFGSNTQATQPLNTGFGNLAQPQIVMQQQ

Localization of GLEBS domain:

Distribution of all 36 FG dipeptides:

Distribution of remaining hydrophobic residues:

Distribution of NQ residues:

Distribution of charged residues:

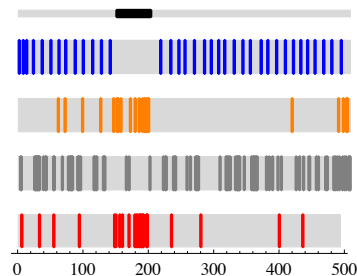

## Saccharomyces cerevisiae Nup100

578 residues (578 without GLEBS domain)

MFGNNRPMFGGSNL~~S~~FGSNTSSFGGQOSQOPN~~S~~LFNGSNNNNNSTSNNAQS~~G~~FGGFTSAAGSNSN~~S~~LFGNN  
 NTQNN~~G~~AFGQSMGATQNS~~P~~FGSLNSSNASNGN~~T~~FGSSSMG~~S~~FGGNTNNAFNNNSNSTNS~~P~~FGFN~~K~~PNTGG  
 TLFGSQNNNSAGTSS~~S~~LFGGQSTSTTG~~T~~FGNTGSS~~S~~FGTGLNGNSN~~I~~FGAGNNSQSN~~T~~TG~~S~~LFGNQOSS~~A~~FG  
 TNNQOG~~S~~LFGQOSQNTNN~~A~~FGNQNLGGSS~~S~~FGSKPVGSG~~S~~LFGQSNNTLGN~~T~~TNNR~~G~~LFQMNSSNQSS  
 NS~~G~~LFQNSMNSSTQ~~G~~VFGQNNNQMQINGNNNN~~S~~LF~~G~~KANTFSNSASG~~G~~LFQNNQOQGS~~G~~LFQNSQTS  
 SS~~G~~LFQNNQKQPN~~T~~FTQSN~~T~~G~~I~~LFQNNNQOQOST~~G~~LF~~G~~AKPAGTTG~~S~~LFGGNSSTQPN~~S~~LF~~G~~TTNVPT  
 SNTQSQQGN~~S~~LF~~G~~AT~~K~~LTN~~M~~PFGNPTANQSGSGN~~S~~LF~~G~~T~~K~~PASTTG~~S~~LFGNNTASTTV~~P~~STN~~G~~LF~~G~~NNAN  
 NSTSTNT~~T~~LF~~G~~AKP~~D~~SQ~~K~~PALGG~~S~~LF~~G~~NSNSNSTIGQNK~~P~~VFGTTQNT~~G~~LF~~G~~ATGTNSSAVGSTG~~K~~Q  
 NNN~~T~~LN~~V~~GT

Localization of GLEBS domain:

Distribution of all 43 FG dipeptides:

Distribution of remaining hydrophobic residues:

Distribution of NQ residues:

Distribution of charged residues:

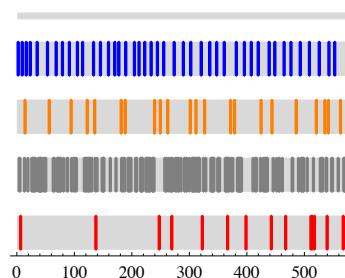

## Saccharomyces cerevisiae Nup116

737 residues (680 without GLEBS domain)

MFGVSRGAFPSATTQ~~P~~FGSTGS~~T~~FGGQOQOQOPVANTS~~A~~FGLSQQTNTTQ~~A~~PAFGNFGNQTSSNS~~P~~FGMSG  
 TTANGT~~P~~FGQSQLTNNNASGS~~I~~FGGMGNNTALSAGSASvvpnstagtsikpfttfeekdpttgvinvfqsi  
 tcmpeyrnfsfeelrfqdyqagr~~K~~FGTSQNGTGTTFNNPQGTNT~~T~~GFGIMGNNSSTTSATTG~~G~~LFQ~~K~~PAT  
 GMFGTGTGSGG~~G~~FGSGATNST~~G~~LFGSSTNLSGNS~~A~~FGANKPATSG~~G~~LFQNTNNPTNGTNN~~T~~LF~~G~~QONS  
 TNG~~G~~LFQOQN~~S~~FGANNVSNGG~~A~~FGQVNRGAFPOQQTQOGSGG~~I~~FGQSNANANGG~~A~~FGQOQGTGAL~~F~~GAKP  
 ASG~~G~~LFQQSAGS~~K~~AFGMNTNP~~T~~GTTG~~G~~LFQQTNQOQSGG~~G~~LFQOQNSNAG~~G~~LFQNNQSQNQ~~S~~LF~~G~~QON  
 SSN~~A~~FGQPQOQ~~G~~LF~~G~~SKPAG~~G~~LFQOQOQASTFASGNAQNN~~S~~IFGQNNQOQOST~~G~~LF~~G~~QNNQSQSQ~~P~~GG  
 LFGQTNQNNNQ~~P~~FGQNGLQOPQOQNN~~S~~LF~~G~~AKPT~~G~~FGNTSLFSNSTTNQSNGISGNNLQOQSGGLFQNKQOP  
 ASG~~G~~LF~~G~~SKPSNTVGG~~G~~LF~~G~~NNQVANQNNPASTSG~~G~~LF~~G~~SKPATG~~S~~LFGGTNSTAPNASSGG~~I~~FGSNNASN  
 TAATTNST~~G~~LF~~G~~NKPVGAGASTSAG~~G~~LF~~G~~NNNNSSLNNSNGST~~G~~LF~~G~~SNNTSQSTNAG~~G~~LFQNN~~T~~STNTSG  
 GGLFSQPSQSMASQSNALQOQOQOQR

Localization of GLEBS domain:

Distribution of all 47 FG dipeptides:

Distribution of remaining hydrophobic residues:

Distribution of NQ residues:

Distribution of charged residues:

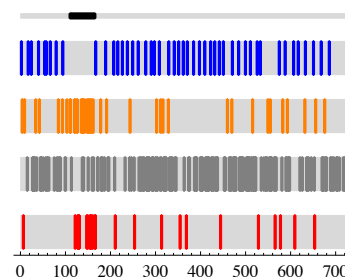

## *Dictyostelium discoideum* Nup220

719 residues (669 without GLEBS domain)

MFGGQFGSFGAKPAATASPFGAPSAAPTTS~~SLFG~~STAPSSGFGGFGSTAQTTPTTGFGGFGGGFGGATTTO  
QPAASPFGGGGTGGSGLFGSSAQTTPPGASPFGGGFGTTTTTTTQPGASPFGGTGGGLFGSSAQTTPQ  
QOGASPFGGFGGATTTPSLLSGATGGFGGFGSTTSQTQLGGGGGATSGAFGGSSSPFGSGGATTSSPF  
GGGGGSGFATTQkqygtpipyqqtiegnfvsisampqyndrsfeelrfedithrkdivykTGGSGGGN  
SLFGSTPTTPSSPFGAQTTPQTGGGLFGGQTTS~~PFG~~GOTSATPGSSSLFGSTOPTQOOTSGLFGSVOPT  
QOQAGGGLFGSMPTGGSSSLFGSTOPTQOQTGGAOPTQSLFGGQTTPPFGSQTSTPFGQPQONTGSG  
LFGAQQTQONTGGGLFGAOPTQTSGGGLFGTQPTSGTGLFGTSPTAGGTGLFGTTQPTSQGTGLFGTTQ  
PTTQGTGLFGTSPTSGTGLFGSTPTSGTGLFGSTPTSGTGLFGSAOPPQOQSOTSLFGNTGTGATNTGTG  
LFGSAQPSNPGGGLFGSAQPTTTGGLFGSNQPTAQPTTSLFGNTTGSVGLGATPNIISGLFGSNPAQT  
GGLFGSTOPTTQTS~~SLFG~~NTGSTGLGAQNGGGLFGNLSOPTATAGQLSGGLFGNLSOPTATAGQLSSGG  
LFGNTLLG

Localization of GLEBS domain:

Distribution of all 56 FG dipeptides:

Distribution of remaining hydrophobic residues:

Distribution of NQ residues:

Distribution of charged residues:

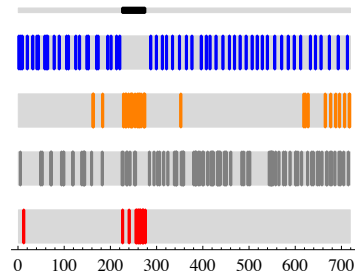

## *Arabidopsis thaliana* Nup98B

668 residues (620 without GLEBS domain)

MFGSSNNNPFQSSISSPFGTQTHSLFGQTNNNASNNPFATKPFGTSTPFGAQTGSSMFGTSTGVFGAPQ  
TSSPFGASPPAFGSSTQAFGASSTPSFGSSNSPFGGTSTFGKSFGLSTPSSPFGSTTQOSQPAFGNSTF  
GSSTPFGASTTAPFGASSTPAFGVSNSTSGFGATNTPGFGATNTTGFGSSTPGFGASSTPAFGSTNTPAFG  
ASSTPLFGSSSSPAFGASPPAFGSSGNAFGNNTFSSGGAFGSSSTPTFGASNTSAFGASSSPSFNFGSSP  
AFGQSTSAFGSSSFGSTQSSLGSTPSPFGAQAQASTSTFGGQSTIGGQGGsrvipyaptttdasgtesk  
serlqsisampahkgknmeelrwydqrgdkGGQRSTGQSPFAGFGVTNSQPSIFSTSPAFSQTTPVNPTN  
PFSQTTPTSNNTNFSPFSQPTTPSFGQPTTPSFRTSVSNSTTSVFGSSSLTTNTSQPLGSSIFGSTPAHGS  
TPGFSIGGFNNSQSSPLFGSNPSFAQNTTPAFSQTSPPLFGQNTTPALGQSSSVFGQNTNPALVQSNFTSTP  
STGFGNTFSSSSSLTTSISPFGQITPAVTPFQSAOPTQPLGAFGFNFGQTQIANTTDIAGAMGTFSGQNF  
KQOPALGNSAVMQPTPVTNPFGTLPALPQ

Localization of GLEBS domain:

Distribution of all 52 FG dipeptides:

Distribution of remaining hydrophobic residues:

Distribution of NQ residues:

Distribution of charged residues:

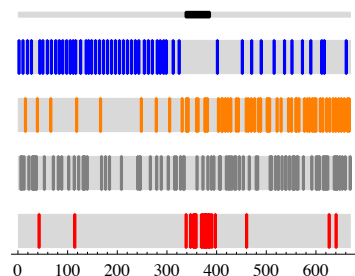

## *Tetrahymena thermophila* macronuclear Nup98A

666 residues (633 without GLEBS domain)

MFGNTGGGGLFGNTQTQQTGGGLFGQPQQTQFGQTGATGGGLFGGATNTFGGGGGGLFGGNNNQTNPTA  
 GGGIFGQGTTLGGAPAQTTGGGLFGAPQNNQGGGLFGGGTTTGGGMFGNQANTQTGGGGLFGGPSQPTTQP  
 PAFSLNNPTTGGGGLFGQPANTMGGNNGGLFGGQTNSTFGANNMLGNNNRPOGAGIFGGATTTAPTGTNTGM  
 FGGIGANNNGGGLFGMNNNTNTNPTGGFGATNPTAGGGGLFGGGATTTGGGGLFGGGNTQGGGLLTANTTA  
 GGLLGGGFNMNNNTGGILGQTNNOFGLGSFGTNNNAAAAPFQPKASANGvltkpnecnlyaisngtdfci  
 felaltqrklvkAGQLKPGAQQAGGMFGQPAQGGNGLFGGGGAATTTTFFGAQNGNLFGGQNTQAQGGGLF  
 GAPVNNAATGAGGGLFGAKPAATTTGGGLFGQMPAQTTGGFLGNATQAPAGGGLFGGATTTQAPGGGGGGGL  
 FGGNTTAATTGGGLFGGNTQTGGATGGLFGGQPPNNQGGFLNTGNANNANTGGGLFGGATTTTPATGGGLF  
 GGSTNTQPLATGGGLFGNNQGASQPAQGGGLFGGAAPQONSLFGGATAGGQTTGLFGGATGATQQQGGGL  
 FGQTASNPTQGGGLFGAANPLGGAAA

Localization of GLEBS domain:

Distribution of all 42 FG dipeptides:

Distribution of remaining hydrophobic residues:

Distribution of NQ residues:

Distribution of charged residues:

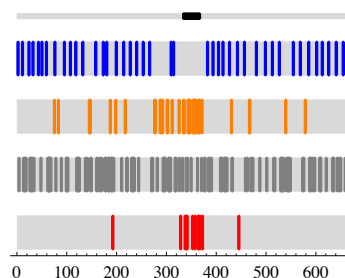

## *Trypanosoma brucei* Nup158

565 residues (565 without GLEBS domain)

MSAGFGGGFGQPAATGFGQPTGFGQAPQGGAFGQVAPAAATGFGQPSQSAVTGFGQTNTGFGQPAATG  
 FGQPAQGAVTGFGQTNTGFGQPAATGFGQPAQSAVTGFGQTNTGFGQPAQGGFGQTAAAANAFGQAG  
 PSGFGQTNTGFGQQSNSTGFGQAGRGATAGFGQPGTGGFGQPATGGFGQATSASPFQAAAAGRGVGGFGGT  
 AAGTVGGFGQPAATGFGQTATTGFGQPAQAAAAGFGQPATGGFGQATSASPFQAAAAGRGVGGFGGTAA  
 AGTVGGFGQPAAPGGFGQTATAGFGQPARGAAAGFGQPATGGFGQATSASPFQAAAAGRGVGGFGGTAA  
 GTVGGFGQPAATGFGQTATTGFGQPAQGANTFGQGTTPSAGFGQAGRGVTGFGQTGVTGFGQTATTG  
 GFGQPAQGAATGFGQAGRGAAADGFGRPAQAAAAGFGQPATGGFGQATSASPFQAAAAGRGVGGFGGTAA  
 GTVGGFGQPAAPGGFGQTATTGFGQPPRGAAAGFGQPATGGLLAGGSGFGAAAAGAGFGQOSTAS

Localization of GLEBS domain:

Distribution of all 58 FG dipeptides:

Distribution of remaining hydrophobic residues:

Distribution of NQ residues:

Distribution of charged residues:

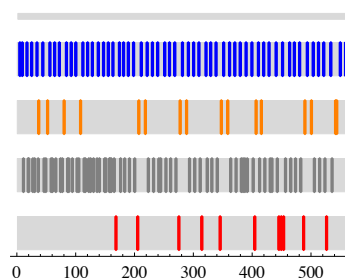

Supplement: supp2 [file elife-04251-supp2-v1.pdf]
